# Supplementary material for: Systematic evaluation of TP53 codon 72 polymorphism associated with onset and progression of oral potentially malignant disorders
Source: Springer Nature journal article supplement (doi:10.1186/s12903-023-03316-0), 2023-09-11
Supplement: MOESM2 [file 26033182]

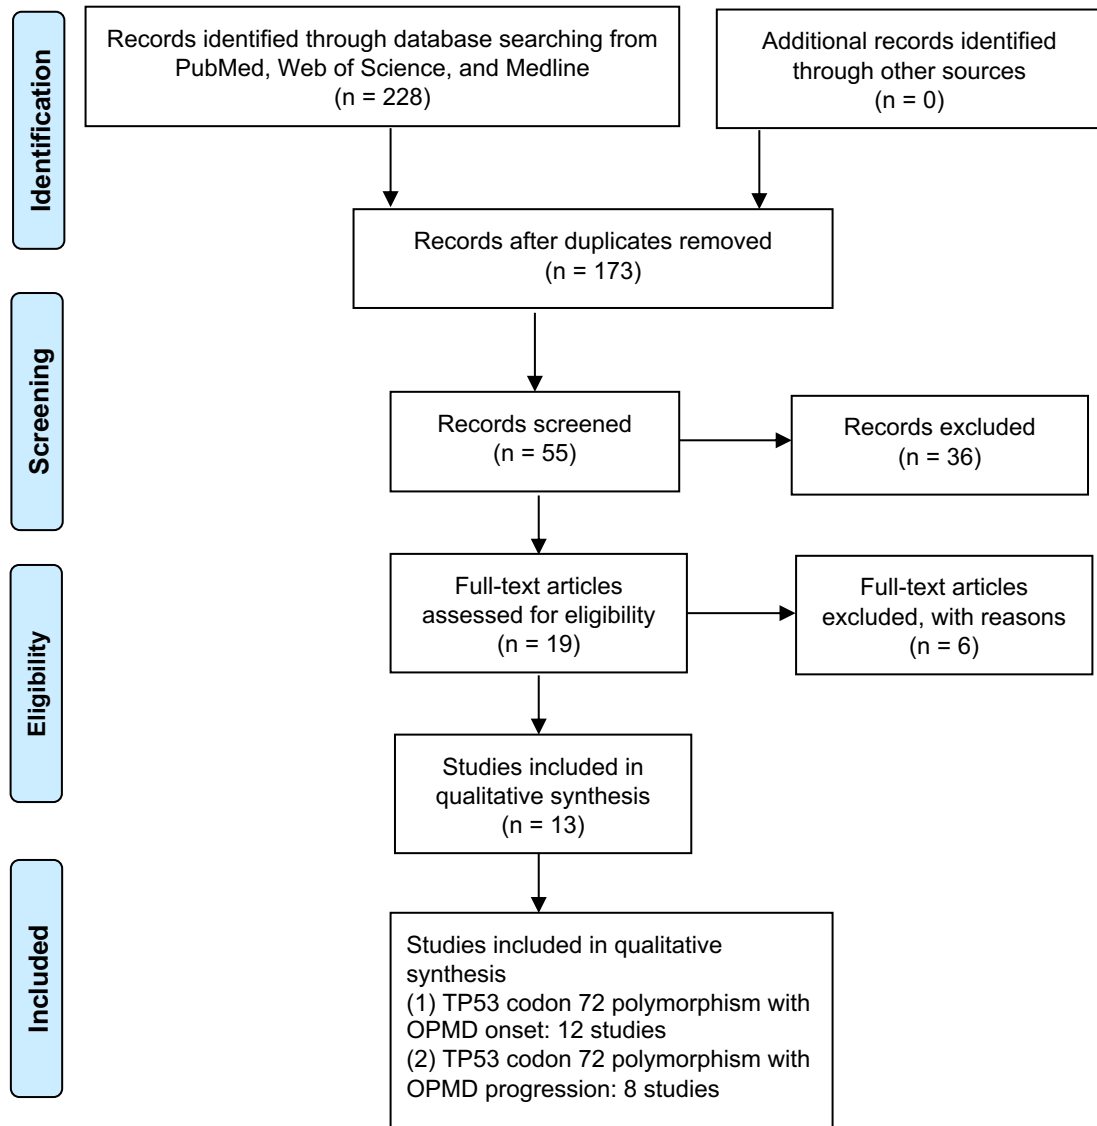

**Figure S1.** Flow diagram of the study selection process.

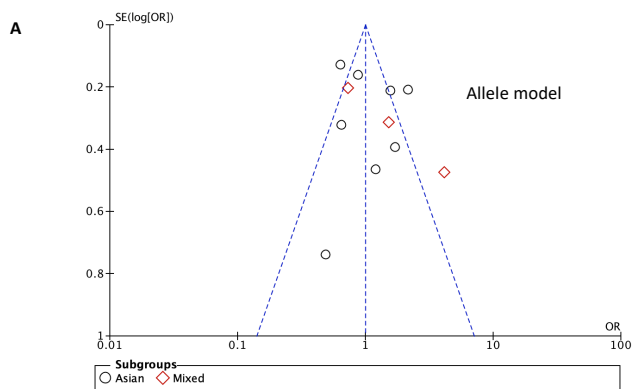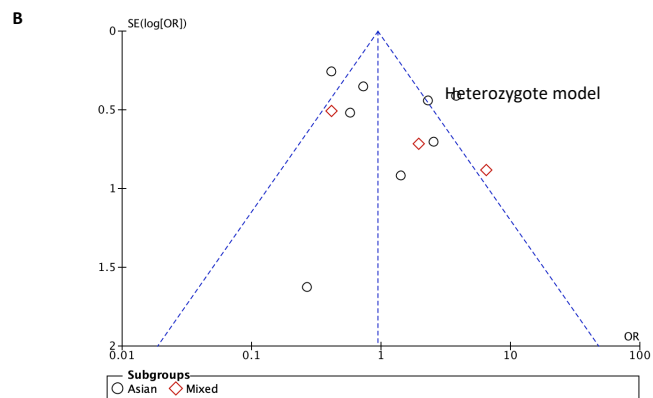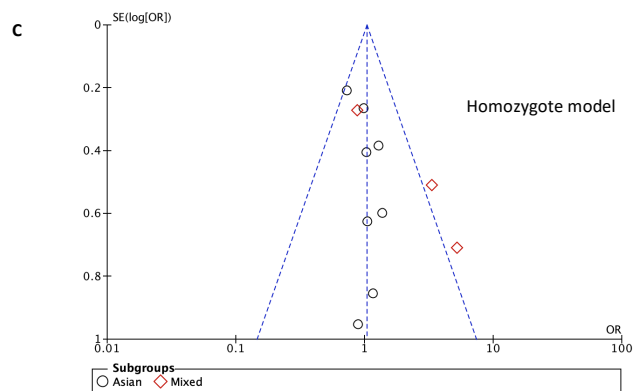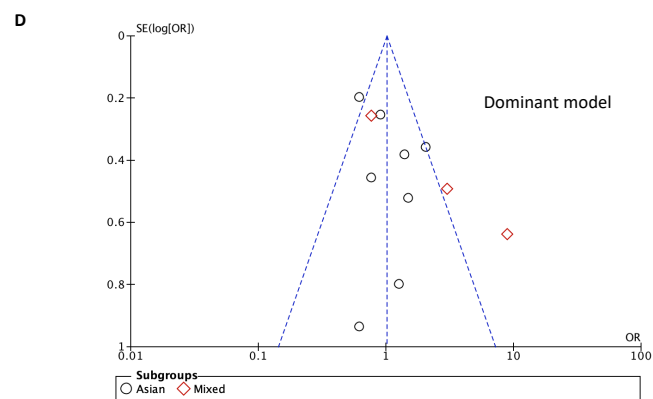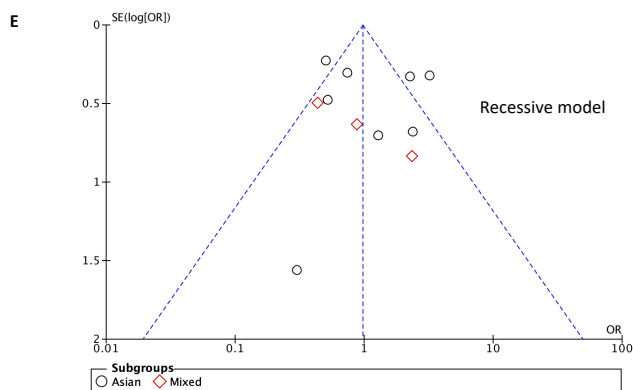

**Figure S2.** Begg's Funnel plots of association between TP53 codon 72 polymorphism with OPMD onset in (A) allele model, (B) heterozygote model, (C) homozygote model, (D) dominant model, (E) recessive model.

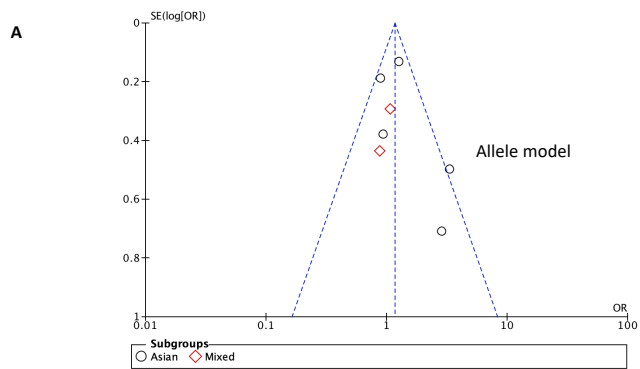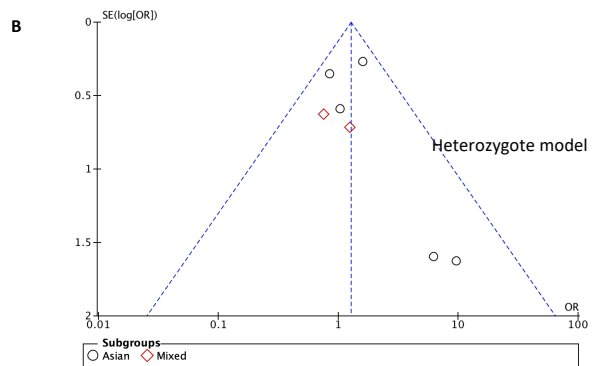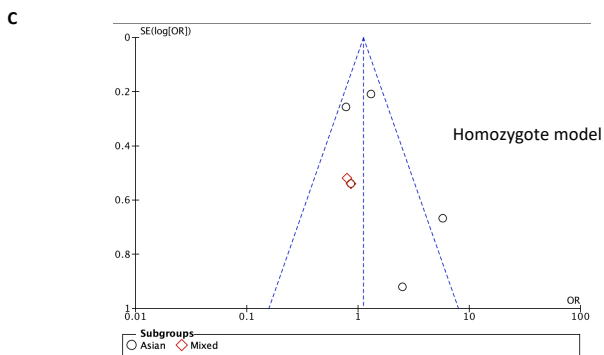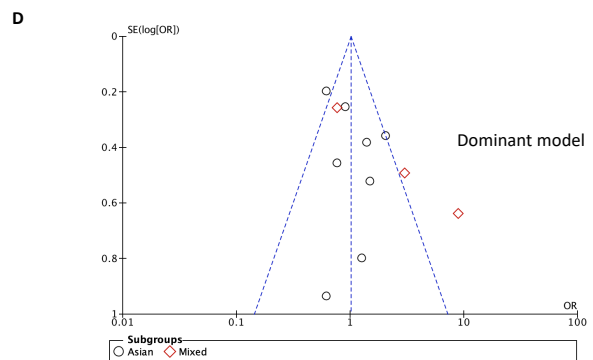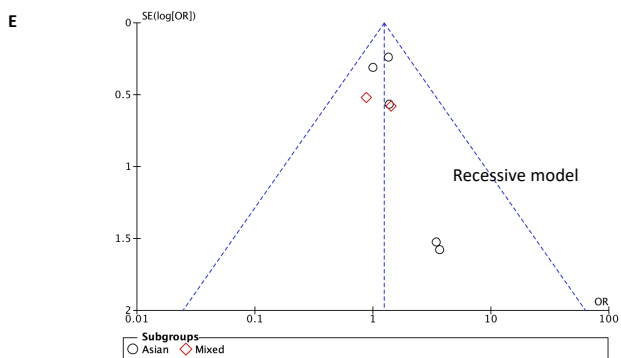

**Figure S3.** Begg's Funnel plots of association between TP53 codon 72 polymorphism with OPMD progression in (A) allele model, (B) heterozygote model, (C) homozygote model, (D) dominant model, (E) recessive model.
